# Supplementary material
Source: PubMed Central journal article supplement (PMC4145805)
Supplement: NIHMS617590-supplement-supplement_1.pdf [file NIHMS617590-supplement-supplement_1.pdf]

Table S1: Demographic Characteristics of Children Receiving Parent Training, Stimulant, and Placebo (*Basic*) Versus Parent Training, Stimulant, and Risperidone (*Augmented*)

|                                       | Total<br>(N=168) | <i>Basic</i><br>(n=84) | <i>Augmented</i><br>(n=64) |
|---------------------------------------|------------------|------------------------|----------------------------|
| Gender, Male (n, %)                   | 129 (76.8%)      | 64 (76.2%)             | 65 (77.4%)                 |
| Disorder                              |                  |                        |                            |
| CD                                    | 44 (26.2%)       | 22 (26.2%)             | 22 (26.2%)                 |
| ODD                                   | 124 (73.8%)      | 62 (73.8%)             | 62 (73.8%)                 |
| Age (years at screening; mean [SD])   | 8.89 (2.01)      | 8.75 (1.98)            | 9.03 (2.05)                |
| IQ (at screening; mean [SD])          | 97.1 (14.1)      | 97.0 (13.9)            | 97.2 (14.4)                |
| Race/Ethnicity (n, %)                 |                  |                        |                            |
| African American                      | 58 (34.5)        | 30 (35.7)              | 28 (33.3)                  |
| Multiracial                           | 17 (10.1)        | 10 (11.9)              | 7 (8.3)                    |
| White                                 | 89 (53.0)        | 41 (48.8)              | 48 (57.1)                  |
| Other <sup>a</sup>                    | 4 (2.4)          | 3 (3.6)                | 1 (1.2)                    |
| Hispanic Origin                       | 9 (5.4)          | 5 (6.0)                | 4 (4.8)                    |
| Non-Hispanic Origin                   | 157 (93.5)       | 78 (92.9)              | 79 (94.0)                  |
| Unknown                               | 2 (1.2)          | 1 (1.2)                | 1 (1.2)                    |
| Child's Type of School                |                  |                        |                            |
| Regular Public (or private parochial) | 145 (86.3)       | 73 (86.90)             | 72 (85.7)                  |
| Other <sup>b</sup>                    | 23 (13.7)        | 11 (13.1)              | 12 (14.3)                  |

|                             |            |           |           |
|-----------------------------|------------|-----------|-----------|
| Mother's Employment         |            |           |           |
| SAH                         | 21 (12.5)  | 10 (11.9) | 11 (13.1) |
| Other <sup>c</sup>          | 59 (35.1)  | 28 (33.3) | 31 (36.9) |
| Working full-/part-time     | 88 (52.4)  | 46 (54.8) | 42 (50.0) |
| Father's employment         |            |           |           |
| SAH                         | 1 (0.6)    | 1 (1.2)   | 0 (0.0)   |
| Other <sup>c</sup>          | 75 (44.6)  | 38 (45.2) | 37 (44.0) |
| Working full/part time      | 89 (53.0)  | 42 (50.0) | 47 (56.0) |
| Unknown                     | 3 (1.8)    | 3 (3.6)   | 0 (0.0)   |
| Mother's Education          |            |           |           |
| Some High School or less    | 16 (9.5)   | 4 (4.8)   | 12 (14.3) |
| High School Graduate or GED | 40 (23.8)  | 16 (19.0) | 24 (28.6) |
| Some College or More        | 111 (66.1) | 63 (75.0) | 48 (57.1) |
| Not in Household/Unknown    | 1 (0.6)    | 1 (1.2)   | 0 (0.0)   |
| Father's Education          |            |           |           |
| Some High School or Less    | 7 (4.2)    | 3 (3.6)   | 4 (4.8)   |
| High School Graduate or GED | 49 (29.2)  | 23 (27.4) | 26 (31.0) |
| Some College or More        | 59 (35.1)  | 29 (34.5) | 30 (35.7) |
| Not in Household/Unknown    | 53 (31.5)  | 29 (34.5) | 24 (28.6) |
| Household Income            |            |           |           |
| Less than \$20,000          | 61 (36.3)  | 33 (39.3) | 28 (33.3) |
| \$20,001-\$40,000           | 35 (20.8)  | 16 (19.0) | 19 (22.6) |

|                   |           |           |           |
|-------------------|-----------|-----------|-----------|
| \$40,001-\$60,000 | 24 (14.3) | 9 (10.7)  | 15 (17.9) |
| \$60,000-\$90,000 | 21 (12.5) | 12 (14.3) | 9 (10.7)  |
| >\$90,000         | 21 (12.5) | 10 (11.9) | 11 (13.1) |
| Unknown           | 6 (3.6)   | 4 (4.8)   | 2 (2.4)   |

---

Note: CD = conduct disorder; ODD = oppositional defiant disorder; SAH = stay-at-home.

<sup>a</sup> *Other* category included: Asian American, Native American, and unknown.

<sup>b</sup> *Other* category included: Home school, special class for children with learning disabilities, special class for children with emotional disabilities, or Other (open-ended response).

<sup>c</sup> *Other* category included: Unemployed, disabled, retired, student, not in household, or Other (open-ended response).
